# Supplementary material for: An Update of the Cenchrinae (Poaceae, Panicoideae, Paniceae) and a New Genus for the Subtribe to Clarify the Dubious Position of a Species of Panicum L
Source: MDPI journal article supplement (doi:10.3390/plants12040749), 2023-02-07
Supplement: s1 [file s1]

**Table S1.** Taxa, voucher information, and GenBank accession numbers for *ndhF* sequences. Species of the subgenera *Paurochaetium* and *Reverchoninae* of *Setaria* P. Beauv. and sequences obtained for this study are indicated with an asterisk (\*); species without a defined placement in [29] are indicated with double asterisk (\*\*). Accepted names for *Setaria* species follow [17,18], and the remainder Cenchrinae taxa plus the outgroup follow [33]; herbarium acronyms follow [97].

| Ingroup taxa (Cenchrinae)                                                                       | Voucher information<br>(from this study and when available)          | GenBank<br>accession |
|-------------------------------------------------------------------------------------------------|----------------------------------------------------------------------|----------------------|
| <i>Acritochaete volkensii</i> Pilg.                                                             | Guinea, North Bioko, M. Carvalho 3691 (G)                            | HE573491             |
| <i>Alexfloydia repens</i> B.K. Simon (1)                                                        | Australia, S.J. & T.R. Hodgkinson 9391 (TCD)                         | HE573538             |
| <i>Alexfloydia repens</i> (2)                                                                   | Australia, Cordwells Creek, A.G. Floyd 2165 (BRS)                    | OQ383283*            |
| <i>Cenchrus abyssinicus</i> (Hack.) Morrone                                                     | Ethiopia, Shewa, G. Aweke 2912 (MO)                                  | EU741938             |
| <i>Cenchrus alopecuroides</i> Thunb.                                                            |                                                                      | AY029672             |
| <i>Cenchrus americanus</i> (L.) Morrone                                                         |                                                                      | AF499149             |
| <i>Cenchrus caliculatus</i> Cav.                                                                |                                                                      | EF189886             |
| <i>Cenchrus caudatus</i> (Schrader.) Kuntze                                                     | South Africa, Mpumalanga, E.A. Kellogg 1123 (MO)                     | EU741936             |
| <i>Cenchrus ciliaris</i> L. (1)                                                                 |                                                                      | AY029625             |
| <i>Cenchrus ciliaris</i> L. (2)                                                                 | South Africa, Mpumalanga, E.A. Kellogg 1125 (MO)                     | EU741937             |
| <i>Cenchrus echinatus</i> L.                                                                    |                                                                      | AF499151             |
| <i>Cenchrus flaccidus</i> (Griseb.) Morrone                                                     |                                                                      | AF499150             |
| <i>Cenchrus longisetus</i> M.C. Johnst.                                                         |                                                                      | EF189888             |
| <i>Cenchrus mutilatus</i> Kuntze                                                                |                                                                      | AY188498             |
| <i>Cenchrus myosuroides</i> Kunth                                                               |                                                                      | AF499152             |
| <i>Cenchrus pilosus</i> Kunth                                                                   |                                                                      | EF189887             |
| <i>Cenchrus setaceus</i> (Forssk.) Morrone                                                      |                                                                      | AY029673             |
| <i>Cenchrus setiger</i> Vahl                                                                    |                                                                      | AF499153             |
| <i>Chamaeraphis hordeacea</i> R. Br.                                                            |                                                                      | JN604680             |
| <i>Dissochondrus biflorus</i> (Hildebr.) Kuntze                                                 |                                                                      | JN604686             |
| <i>Hygrochloa aquatica</i> Lazarides                                                            |                                                                      | JN604690             |
| <i>Ixophorus unisetus</i> (J. Presl) Schltldl. (1)                                              |                                                                      | AY623749             |
| <i>Ixophorus unisetus</i> (2)                                                                   | Mexico, Michoacán, O. Morrone 3638 (SI)                              | EU741940             |
| <i>Panicum antidotale</i> Retz. (1)<br>(= <i>Janochloa antidotale</i> (Retz) Zuloaga & Delfini) | Argentina, Jujuy, F.O. Zuloaga 7091 (SI)                             | AY188456             |
| <i>Panicum antidotale</i> (2)                                                                   | Colombia, Magdalena, L. Atehortúa 04 (SI)                            | OQ383284*            |
| <i>Paractaenum novae-hollandiae</i> P. Beauv.                                                   |                                                                      | JN604697             |
| <i>Paratheria prostrata</i> Griseb.                                                             |                                                                      | JN604699             |
| <i>Plagiosetum refractum</i> (F. Muell.) Benth. (1)                                             | Australia, locality not indicated, S. Jacobs 9600 (NSW)              | EU819409             |
| <i>Plagiosetum refractum</i> (2)                                                                | Australia, locality not indicated, S.J. & T.R. Hodgkinson 9600 (TDC) | HE573564             |
| <i>Pseudochaetochloa australiensis</i> Hitchc.                                                  |                                                                      | JN604702             |
| <i>Pseudoraphis paradoxa</i> (R. Br.) Pilg.                                                     |                                                                      | EF189892             |
| <i>Pseudoraphis spinescens</i> (R. Br.) Vickery                                                 |                                                                      | MF998495             |
| <i>Setaria albobillosa</i> (S.T. Blake) R.D. Webster                                            | Australia, Queensland, Clarkson & Henderson 7926 (CANB)              | EU741984             |
| <i>Setaria alonsoi</i> Pensiero & Anton                                                         | Argentina, Córdoba, J.F. Pensiero 6973 (SF)                          | EU741943             |
| <i>Setaria appendiculata</i> (Hack.) Stapf                                                      | Namibia, locality not indicated, Giess 13524 (WIND)                  | EU747685             |

|                                                      |                                                             |           |
|------------------------------------------------------|-------------------------------------------------------------|-----------|
| <i>Setaria atrata</i> Hack. (1)                      | Ethiopia, Wollega, Gilbert & Thulin 729 (MO)                | EU747689  |
| <i>Setaria atrata</i> (2)                            | Madagascar, locality not indicated, RGD 196 (K)             | MF998497  |
| <i>Setaria barbata</i> (Lam.) Kunth (1)              |                                                             | AF499145  |
| <i>Setaria barbata</i> (2)                           | Venezuela, Distrito Federal, O. Morrone 4804 (SI)           | EU741944  |
| <i>Setaria basioclada</i> (Hughes) R.D. Webster      | Australia, South Australia, Bates 46269 (AD)                | EU741978  |
| <i>Setaria cernua</i> Kunth (1)**                    | Ecuador, Pichincha, S. Lægaard 70467 (MO)                   | EU741945  |
| <i>Setaria cernua</i> (2)                            | Ecuador, Pichincha, I. Grignon 84160 (MO)                   | OQ383285* |
| <i>Setaria chapmanii</i> (Vasey) Pilg.*              | Mexico, Quintana Roo, G. Davidse 20121 (MO)                 | OQ383286* |
| <i>Setaria constricta</i> (Domin) R.D. Webster       | Australia, Western Australia, Lepschi & Lally 2643 (AD)     | EU741979  |
| <i>Setaria distantiflora</i> (A. Rich.) Pilg.*       | Cuba, Mariel, E.L. Ekman 1032 (MO)                          | OQ383287* |
| <i>Setaria faberi</i> R.A.W. Herrm.                  | China, Xiushiu, Liu 890105 (MO)                             | EU741946  |
| <i>Setaria fiebrigii</i> R.A.W. Herrm. (1)           | Argentina, Entre Ríos, F.O. Zuloaga 7044 (SI)               | EU741947  |
| <i>Setaria fiebrigii</i> (2)                         | Argentina, Misiones, F.O. Zuloaga 7134 (SI)                 | EU741948  |
| <i>Setaria flavida</i> (Retz.) Veldkamp (1)          |                                                             | EF189889  |
| <i>Setaria flavida</i> (2)                           |                                                             | EF189890  |
| <i>Setaria flavida</i> (3)                           | Australia, New South Wales, Moore 7584 (CANB)               | EU741980  |
| <i>Setaria geminata</i> (Forssk.) Veldkamp (1)**     |                                                             | AY029662  |
| <i>Setaria geminata</i> (2)                          | Argentina, Corrientes, S.S. Aliscioni 718 (SI)              | OQ383288* |
| <i>Setaria globoidea</i> (Domin) R.D. Webster        | Australia, New South Wales, Lloyd 1007 (CANB)               | EU741981  |
| <i>Setaria globulifera</i> (Steud.) Griseb.          | Argentina, Entre Ríos, F.O. Zuloaga 7041 (SI)               | EU741949  |
| <i>Setaria grandis</i> Stapf                         | Malawi, Chelidini Valley, Phillips 1070 (MO)                | EU747688  |
| <i>Setaria grisebachii</i> E. Fourn.                 |                                                             | AF499141  |
| <i>Setaria hassleri</i> Hack.                        | Argentina, Misiones, S.S. Aliscioni 533 (SI)                | EU741950  |
| <i>Setaria homonyma</i> (Steud.) Chiov.              | South Africa, KwaZulu-Natal, E.A. Kellogg 1113 (MO)         | EU741988  |
| <i>Setaria hunzikeri</i> Anton                       | Argentina, San Luis, L. Corradi 119 (BAA)                   | OQ383289* |
| <i>Setaria italica</i> (L.) P. Beauv.                |                                                             | AF499140  |
| <i>Setaria jubiflora</i> (Trin.) R.D. Webster        |                                                             | EF189891  |
| <i>Setaria kagerensis</i> Mez (1)                    | Nigeria, Jos Plateau, Tuley 1579 (K)                        | EU741951  |
| <i>Setaria kagerensis</i> (2)                        | Angola, Maiombe, s.c. 9021 (US)                             | EU741971  |
| <i>Setaria lachnea</i> (Nees) Kunth (1)              | Argentina, Córdoba, L.M. Giussani 327 (SI)                  | EU741952  |
| <i>Setaria lachnea</i> (2)                           | Argentina, Misiones, F.O. Zuloaga 6758 (SI)                 | EU741953  |
| <i>Setaria leonis</i> (Ekman ex Hitchc.) León*       | Turks & Caicos, South Caicos, D.L. Correll 49273 (MO)       | OQ383290* |
| <i>Setaria leucopila</i> (Scribn. & Merr.) K. Schum. | Argentina, Salta, M.A. Beilstein 03-127 (MO)                | EU741954  |
| <i>Setaria lindenbergiana</i> (Nees) Stapf           | South Africa, Gauteng, E.A. Kellogg 1136 (MO)               | EU741994  |
| <i>Setaria longipila</i> E. Fourn. (1)               | Mexico, Sierra Madre, Rose 2017 (US)                        | OQ383291* |
| <i>Setaria longipila</i> (2)                         | Honduras, Depto. Morazán, Molina 3204 (US)                  | OQ383292* |
| <i>Setaria longiseta</i> P. Beauv.                   | Tanzania, Kigoma, R.E. Gereau 6013 (MO)                     | EU741955  |
| <i>Setaria macrostachya</i> Kunth (1)                | Argentina, Córdoba, J.F. Pensiero 6961 (SF)                 | EU747691  |
| <i>Setaria macrostachya</i> (2)                      | Argentina, Salta, O. Morrone 4638 (SI)                      | EU741956  |
| <i>Setaria madecassa</i> A. Camus                    | Madagascar, locality not indicated, M.S. Vorontsova 979 (K) | LN908172  |
| <i>Setaria magna</i> Griseb. (1)**                   | Argentina, Corrientes, S.S. Aliscioni 577 (SI)              | EU741957  |
| <i>Setaria magna</i> (2)                             | Argentina, Corrientes, S.S. Aliscioni 707 (SI)              | OQ383293* |
| <i>Setaria mendocina</i> Phil.                       | Argentina, San Luis, F.O. Zuloaga 8085 (SI)                 | EU741958  |
| <i>Setaria nicorae</i> Pensiero (1)                  | Argentina, Formosa, J.F. Pensiero 6909 (SI)                 | EU747686  |
| <i>Setaria nicorae</i> (2)                           | Argentina, Chaco, S.S. Aliscioni 644 (SI)                   | OQ383294* |

|                                                                      |                                                               |           |
|----------------------------------------------------------------------|---------------------------------------------------------------|-----------|
| <i>Setaria nigrirostris</i> (Nees) T. Durand & Schinz (1)            | South Africa, Gauteng, E.A. Kellogg 1140 (MO)                 | EU741991  |
| <i>Setaria nigrirostris</i> (2)                                      | South Africa, Limpopo, E.A. Kellogg 1133 (MO)                 | EU741992  |
| <i>Setaria nigrirostris</i> (3)                                      | South Africa, Limpopo, E.A. Kellogg 1132 (MO)                 | EU742004  |
| <i>Setaria nigrirostris</i> (4)                                      | South Africa, KwaZulu-Natal, E.A. Kellogg 1114 (MO)           | EU741989  |
| <i>Setaria nigrirostris</i> (5)                                      | Tanzania, Iringa, Greenway & Kanuri 14010 (MO)                | EU741941  |
| <i>Setaria nigrirostris</i> (6)                                      | South Africa, KwaZulu-Natal, E.A. Kellogg 1120 (MO)           | EU741990  |
| <i>Setaria nigrirostris</i> (7)                                      | Madagascar, locality not indicated, M.S. Vorontsova 1641 (K)  | LN908171  |
| <i>Setaria oblongata</i> (Griseb.) Parodi                            | Argentina, Córdoba, J.F. Pensiero 6972 (SI)                   | EU741959  |
| <i>Setaria orthosticha</i> R.A.W. Herrm.                             | Uganda, Kachwekano, Purseglove 3331 (K)                       | EU747690  |
| <i>Setaria palmifolia</i> (J. Koenig) Stapf (1)                      |                                                               | AF499144  |
| <i>Setaria palmifolia</i> (2)                                        |                                                               | AY029680  |
| <i>Setaria pampeana</i> Parodi ex Nicora (1)                         | Argentina, Salta, A.M. Cialdella 230 (SI)                     | EU741961  |
| <i>Setaria pampeana</i> (2)                                          | Argentina, Córdoba, L.M. Giussani 325 (SI)                    | EU741960  |
| <i>Setaria parviflora</i> (Poir.) Kerguélen (1)                      |                                                               | AF499143  |
| <i>Setaria parviflora</i> (2)                                        |                                                               | AF499142  |
| <i>Setaria parviflora</i> (3)                                        |                                                               | AY029678  |
| <i>Setaria parviflora</i> (4)                                        | Argentina, Entre Ríos, E.R. Guaglianone 3257 (SI)             | EU742003  |
| <i>Setaria parviflora</i> (5)                                        | Argentina, Entre Ríos, E.R. Guaglianone 3258 (SI)             | EU742000  |
| <i>Setaria paucifolia</i> (Morong) Lindm.                            | Argentina, Corrientes, S.S. Aliscioni 516 (SI)                | EU741962  |
| <i>Setaria perrieri</i> A. Camus                                     | Madagascar, locality not indicated, M.S. Vorontsova 1414 (K)  | LN908170  |
| <i>Setaria petiolata</i> Stapf & C.E. Hubb.                          | Madagascar, locality not indicated, Grosvenor & Renz 1295 (K) | EU741963  |
| <i>Setaria pflanzii</i> Pensiero                                     | Argentina, Jujuy, J.F. Pensiero 7056 (SI)                     | EU741964  |
| <i>Setaria plicata</i> (Lam.) T. Cooke                               | Papua New Guinea, Bougainville, Waterhouse 6145 (CANB)        | EU741965  |
| <i>Setaria pumila</i> (Poir.) Roem. & Schult.                        |                                                               | EF189894  |
| <i>Setaria punctata</i> (Burm. f.) Veldkamp                          | Locality not indicated, M. Norsangsri 2387 (KKU)              | HE575807  |
| <i>Setaria rara</i> (R. Br.) R.D. Webster (1)**                      | Australia, Queensland, Bean 4818 (CANB)                       | EU741982  |
| <i>Setaria rara</i> (2)                                              | Australia, locality not indicated, M. Lazarides 8298 (AD)     | OQ383295* |
| <i>Setaria restioidea</i> (Franch.) Stapf                            | Central Africa, Bamingui-Bangoran, J.M. Fay 6007 (MO)         | EU741967  |
| <i>Setaria retiglumis</i> (Domin) R.D. Webster                       | Australia, Darwin, Dunlop 3514 (CANB)                         | EU741983  |
| <i>Setaria reverchonii</i> (Vasey) Pilg.*                            | United States, Texas, Colquitt 25 (US)                        | OQ383296* |
| <i>Setaria rosengurtii</i> Nicora                                    | Argentina, Entre Ríos, O. Morrone 5211 (SI)                   | EU741968  |
| <i>Setaria sagittifolia</i> (A. Rich.) Walp.                         | Madagascar, locality not indicated, NOP 207 (K)               | MF998496  |
| <i>Setaria scabrifolia</i> (Nees) Kunth                              | Brazil, Paraná, H.M. Longhi-Wagner 9464 (SI)                  | EU741969  |
| <i>Setaria scandens</i> Schrad.                                      | Bolivia, Santa Cruz, O. Morrone 5077 (SI)                     | EU741970  |
| <i>Setaria scheelei</i> (Steud.) Hitchc.*                            | United States, Texas, J.R. Swallen 1580 (US)                  | OQ383297* |
| <i>Setaria scottii</i> (Hack.) A. Camus                              | Madagascar, locality not indicated, M.S. Vorontsova 1041 (K)  | MF998501  |
| <i>Setaria sphacelata</i> (Schumach.) Stapf & C.E. Hubb. ex Moss (1) |                                                               | EF189893  |
| <i>Setaria sphacelata</i> (2)                                        | South Africa, Mpumalanga, E.A. Kellogg 1126 (MO)              | EU741986  |
| <i>Setaria sphacelata</i> (3)                                        | South Africa, KwaZulu-Natal, E.A. Kellogg 1143 (MO)           | EU742002  |
| <i>Setaria sphacelata</i> (4)                                        | Argentina, Misiones, F.O. Zuloaga 7222 (SI)                   | EU741972  |
| <i>Setaria sphacelata</i> (5)                                        | South Africa, Mpumalanga, E.A. Kellogg 1121 (MO)              | EU741997  |
| <i>Setaria sphacelata</i> (6)                                        | South Africa, Eastern Cape, E.A. Kellogg 1104 (MO)            | EU742001  |
| <i>Setaria sulcata</i> (Schult.) Kunth (1)                           | South Africa, Mpumalanga, E.A. Kellogg 1122 (MO)              | EU741987  |

|                                                           |                                                                      |           |
|-----------------------------------------------------------|----------------------------------------------------------------------|-----------|
| <i>Setaria sulcata</i> (2)                                | South Africa, KwaZulu-Natal, E.A. Kellogg 1110 (MO)                  | EU741995  |
| <i>Setaria sulcata</i> (3)                                | South Africa, KwaZulu-Natal, E.A. Kellogg 1112 (MO)                  | EU741996  |
| <i>Setaria sulcata</i> (4)                                | Australia, New South Wales, A. Doust 1368 (MO)                       | AF499146  |
| <i>Setaria sulcata</i> (5)                                | Australia, New South Wales, A. Doust 1369 (MO)                       | AF499147  |
| <i>Setaria sulcata</i> (6)                                | Locality not indicated, H. Schaefer 2008/378 (BM)                    | HE575758  |
| <i>Setaria sulcata</i> (7)                                | Madagascar, locality not indicated, M.S. Vorontsova 310 (K)          | LN908173  |
| <i>Setaria tenacissima</i> Schrad.                        | Bolivia, La Paz, O. Morrone 4860 (SI)                                | EU741973  |
| <i>Setaria uda</i> (S.T. Blake) R.D. Webster (1)**        | Australia, North Kennedy, M. Lazarides 8165 (CANB)                   | EU747687  |
| <i>Setaria uda</i> (2)                                    | Australia, locality not indicated, Cowie & Dunlop 7888 (CANB)        | OQ383298* |
| <i>Setaria utowanaea</i> (Scribn.) Pilg. (1)*             | Colombia, La Guajira, P. Bunch 181 (MO)                              | OQ383299* |
| <i>Setaria utowanaea</i> (2)                              | Venezuela, Eduardo Miranda, J.A. Steyermark 102307 (MO)              | OQ383300* |
| <i>Setaria vaginata</i> Spreng.                           | Argentina, Misiones, F.O. Zuloaga 7124 (SI)                          | EU741974  |
| <i>Setaria variifolia</i> (Swallen) Davidse (1)*          | Mexico, Campeche, E.M. Martínez Salas 27648 (MO)                     | OQ383301* |
| <i>Setaria variifolia</i> (2)                             | Mexico, Campeche, E.M. Martínez Salas 27089 (MO)                     | OQ383302* |
| <i>Setaria vatkeana</i> K. Schum.                         | Madagascar, locality not indicated, M.S. Vorontsova 1813 (K)         | MF998503  |
| <i>Setaria verticillata</i> (L.) P. Beauv. (1)            |                                                                      | EF189900  |
| <i>Setaria verticillata</i> (2)                           | South Africa, Gauteng, E.A. Kellogg 1138 (MO)                        | EU741985  |
| <i>Setaria verticillata</i> (3)                           |                                                                      | AF499139  |
| <i>Setaria verticillata</i> (4)                           | Argentina, Santiago del Estero, J.F. Pensiero 7082 (SF)              | EU741942  |
| <i>Setaria verticilliformis</i> Dumort.                   | Australia, South Australia, Alcock 192 (AD)                          | EU741975  |
| <i>Setaria viridis</i> (L.) P. Beauv.                     |                                                                      | U21976    |
| <i>Setaria vulpiseta</i> (Lam.) Roem. & Schult. (1)       | Bolivia, Santa Cruz, O. Morrone 5023 (SI)                            | EU741977  |
| <i>Setaria vulpiseta</i> (2)                              | Paraguay, Amambay, F.O. Zuloaga 7293 (SI)                            | EU741976  |
| <i>Setaria</i> sp. 1                                      | South Africa, Limpopo, E.A. Kellogg 1129 (MO)                        | EU741998  |
| <i>Setaria</i> sp. 2                                      | South Africa, Limpopo, E.A. Kellogg 1130 (MO)                        | EU741999  |
| <i>Setariopsis auriculata</i> (E. Fourn.) Scribn.         |                                                                      | JN604705  |
| <i>Spinifex littoreus</i> (Burm. f.) Merr.                | Australia, Perth, E.A. Kellogg 1021 (MO)                             | EU741993  |
| <i>Spinifex sericeus</i> R. Br.                           |                                                                      | EF189895  |
| <i>Stenotaphrum dimidiatum</i> (L.) Brongn. (1)           | Locality not indicated, P. Rondeau 04-2005 (G)                       | AM849189  |
| <i>Stenotaphrum dimidiatum</i> (2)                        | Madagascar, locality not indicated, M.S. Vorontsova 632 (K)          | MF998499  |
| <i>Stenotaphrum oostachyum</i> Baker                      | Madagascar, locality not indicated, M.S. Vorontsova 1042 (K)         | LN908182  |
| <i>Stenotaphrum secundatum</i> (Walter) Kuntze            |                                                                      | AY029684  |
| <i>Stenotaphrum unilaterale</i> Baker                     | Madagascar, locality not indicated, M.S. Vorontsova 1043 (K)         | MF998500  |
| <i>Stereochlaena cameronii</i> (Stapf) Pilg.              |                                                                      | JN604708  |
| <i>Uranthoecium truncatum</i> (Maiden & Betche) Stapf (1) | Australia, locality not indicated, S. Jacobs 9599 (NSW)              | EU819410  |
| <i>Uranthoecium truncatum</i> (2)                         | Australia, locality not indicated, S.J. & T.R. Hodgkinson 9604 (TCD) | HE573565  |
| <i>Whiteochloa airoides</i> (R. Br.) Lazarides            | Australia, Northern Territory, A.P. Roberts 4023 (NT)                | MG581794  |
| <i>Whiteochloa biciliata</i> Lazarides                    | Australia, Western Australia, A.A. Mitchell 7974 (NT)                | MG581799  |
| <i>Whiteochloa capillipes</i> (Benth.) Lazarides (1)      |                                                                      | JN604714  |
| <i>Whiteochloa capillipes</i> (2)                         | Australia, Northern Territory, L.G. Adams 3046 (NSW)                 | MG581795  |
| <i>Whiteochloa cymbiformis</i> (Hughes) B.K. Simon        | Australia, locality not indicated, Glober 20 (CANB)                  | MG581797  |
| <i>Whiteochloa multiciliata</i> Lazarides                 | Australia, Northern Territory, M. Lazarides 100 (AD)                 | MG581798  |

|                                                               |                                                                                 |          |
|---------------------------------------------------------------|---------------------------------------------------------------------------------|----------|
| <i>Whiteochloa semitonsa</i> (F. Muell. ex Benth.) C.E. Hubb. | Australia, Northern Territory, <i>A.A. Mitchell</i> 15642 (NT)                  | MG581796 |
| <i>Xerochloa barbata</i> R. Br.                               | Australia, locality not indicated, <i>S.J. &amp; T.R. Hodgkinson</i> 9323 (TCD) | HE573526 |
| <i>Xerochloa laniflora</i> Benth.                             |                                                                                 | JN604715 |
| <i>Zuloagaea bulbosa</i> (Kunth) E. Bess (1)                  | United States, New Mexico, <i>E. Bess</i> 41 (MO)                               | AY864833 |
| <i>Zuloagaea bulbosa</i> (2)                                  |                                                                                 | AY029648 |
| <i>Zygochloa paradoxa</i> (R. Br.) S.T. Blake (female)        |                                                                                 | EF189897 |
| <i>Zygochloa paradoxa</i> (male)                              |                                                                                 | EF189896 |
| <b>Outgroup taxa</b>                                          |                                                                                 |          |
| <i>Aakia tuerckheimii</i> (Hack.) J.R. Grande                 | Mexico, Chiapas, <i>A.L. Cabrera</i> 12312 (SI)                                 | KF982003 |
| <i>Eriochloa acuminata</i> (J. Presl) Kunth                   | Mexico, Coahuila, <i>F.O. Zuloaga</i> 9737 (SI)                                 | GU594634 |
| <i>Eriochloa punctata</i> (L.) Desv. ex Ham.                  | Argentina, Misiones, <i>F.O. Zuloaga</i> 6838 (SI)                              | FJ486528 |
| <i>Moorochloa eruciformis</i> (Sm.) Veldkamp                  | Argentina, Entre Ríos, <i>F.O. Zuloaga</i> 7045 (SI)                            | AY188452 |
| <i>Panicum miliaceum</i> L.                                   |                                                                                 | AY188472 |
| <i>Rupichloa acuminata</i> (Renvoize) Salariato & Morrone     | Brazil, Bahia, <i>F.O. Zuloaga</i> 9029 (SI)                                    | AY029692 |
| <i>Urochloa deflexa</i> (Schumach.) H. Scholz                 | Locality not indicated, <i>G. Besnard</i> 47-2006 (G)                           | AM849200 |
| <i>Urochloa panicoides</i> P. Beauv.                          | Mexico, Tejupilco, <i>F.O. Zuloaga</i> 7358 (SI)                                | FJ486519 |

**Table S2.** A synopsis of species and different classifications for the subgenera *Paurochaetium* and *Reverchoninae* of *Setaria* P. Beauv. since they were erected from *Panicum* L.

| [75]                                                            | [20]                                                                          | [74]                                                                         | [18]                                                   | [26]                                                                                  | Accepted names according to [33]                        |
|-----------------------------------------------------------------|-------------------------------------------------------------------------------|------------------------------------------------------------------------------|--------------------------------------------------------|---------------------------------------------------------------------------------------|---------------------------------------------------------|
| <i>Panicum</i> subg.<br><i>Paurochaetium</i><br>Hitchc. & Chase | <i>Setaria</i> subg.<br><i>Paurochaetium</i><br>(Hitchc. & Chase)<br>Rominger | <i>Paspalidium</i> Stapf                                                     | <i>Setaria</i> subg.<br><i>Setaria</i>                 | <i>Setaria</i> subg.<br><i>Paurochaetium</i><br>(Hitchc. & Chase)<br>Rominger         | <i>Setaria</i> subg.<br><i>Reverchoninae</i> W.E. Fox   |
| <i>Panicum chapmanii</i><br>Vasey                               | <i>Setaria chapmanii</i><br>(Vasey) Pilg.                                     | <i>Paspalidium chapmanii</i> (Vasey)<br>R.W. Pohl                            | <i>Paspalidium chapmanii</i> (Vasey)<br>R.W. Pohl      | <i>Setaria chapmanii</i><br>(Vasey) Pilg.                                             | <i>Setaria chapmanii</i> (Vasey)<br>Pilg.               |
| <i>Panicum distantiflorum</i> A.<br>Rich.                       | <i>Setaria distantiflora</i><br>(A. Rich.) Pilg.                              | <i>Paspalidium distantiflorum</i> (A.<br>Rich.) Davidse &<br>R.W. Pohl       | <i>Setaria distantiflora</i> (A.<br>Rich.) Pilg.       | <i>Setaria distantiflora</i><br>(A. Rich.) Pilg.                                      | <i>Setaria distantiflora</i> (A.<br>Rich.) Pilg.        |
| <i>Panicum leonis</i><br>Ekman ex Hitchc.                       | <i>Setaria leonis</i><br>(Ekman ex Hitchc.)<br>León                           | <i>Paspalidium leonis</i><br>(Ekman ex<br>Hitchc.) Davidse<br>& R.W. Pohl    | <i>Setaria leonis</i><br>(Ekman ex<br>Hitchc.) León    | <i>Setaria leonis</i><br>(Ekman ex<br>Hitchc.) León                                   | <i>Setaria leonis</i> (Ekman ex<br>Hitchc.) León        |
| <i>Panicum pradanum</i><br>León ex Hitchc.                      | <i>Setaria pradana</i><br>(León ex Hitchc.)<br>León                           | <i>Paspalidium pradanum</i> (León ex<br>Hitchc.) Davidse<br>& R.W. Pohl      | <i>Setaria pradana</i><br>(León ex Hitchc.)<br>León    | <i>Setaria pradana</i><br>(León ex Hitchc.)<br>León                                   | <i>Setaria pradana</i> (León ex<br>C.L. Hitchc.) León   |
| <i>Panicum utowanaeum</i> Scribn.                               | <i>Setaria utowanaea</i><br>(Scribn.) Pilg.                                   | <i>Paspalidium utowanaeum</i><br>(Scribn.) Davidse<br>& R.W. Pohl            | <i>Setaria utowanaea</i><br>(Scribn.) Pilg.            | <i>Setaria utowanaea</i><br>var. <i>utowanaea</i><br>(Scribn.) Pilg.                  | <i>Setaria utowanaea</i> (Scribn.)<br>Pilg.             |
| <i>Panicum ophiticola</i><br>Hitchc. & Ekman                    | <i>Setaria ophiticola</i><br>(Hitchc. & Ekman)<br>León                        | <i>Paspalidium ophiticola</i> (Hitchc.<br>& Ekman)<br>Davidse & R.W.<br>Pohl | <i>Setaria ophiticola</i><br>(Hitchc. &<br>Ekman) León | <i>Setaria utowanaea</i><br>var. <i>ophiticola</i><br>(Hitchc. & Ekman)<br>W.E. Fox   | <i>Setaria utowanaea</i> (Hitchc.<br>& Ekman) W.E. Fox. |
|                                                                 | <i>Setaria subtransiens</i><br>Hitchc. & Ekman                                | <i>Paspalidium subtransiens</i><br>(Hitchc. & Ekman)                         | <i>Setaria subtransiens</i><br>Hitchc. & Ekman         | <i>Setaria utowanaea</i><br>var. <i>subtransiens</i><br>(Hitchc. & Ekman)<br>W.E. Fox | <i>Setaria utowanaea</i> (Hitchc.<br>& Ekman) W.E. Fox  |

|                                            |                                                      |                                                      |                                                                                      |                                                                                   |
|--------------------------------------------|------------------------------------------------------|------------------------------------------------------|--------------------------------------------------------------------------------------|-----------------------------------------------------------------------------------|
| Davidse & R.W.<br>Pohl                     |                                                      |                                                      |                                                                                      |                                                                                   |
| <i>Panicum reverchonii</i><br>Vasey        | <i>Setaria reverchonii</i><br>(Vasey) Pilg.          | <i>Setaria reverchonii</i><br>(Vasey) Pilg.          | <i>Setaria reverchonii</i><br>subsp. <i>reverchonii</i><br>Vasey) Pilg.              | <i>Setaria reverchonii</i> subsp.<br><i>reverchonii</i> (Vasey) Pilg.             |
| <i>Panicum firmulum</i><br>Hitchc. & Chase | <i>Setaria firmula</i><br>(Hitchc. & Chase)<br>Pilg. | <i>Setaria firmula</i><br>(Hitchc. &<br>Chase) Pilg. | <i>Setaria reverchonii</i><br>subsp. <i>firmula</i><br>(Hitchc. & Chase)<br>W.E. Fox | <i>Setaria reverchonii</i> subsp.<br><i>firmula</i> (Hitchc. & Chase)<br>W.E. Fox |
| <i>Panicum ramisetum</i><br>Scribn.        | <i>Setaria ramiseta</i><br>(Scribn.) Pilg.           | <i>Setaria ramiseta</i><br>(Scribn.) Pilg.           | <i>Setaria reverchonii</i><br>subsp. <i>ramiseta</i><br>(Scribn.) W.E. Fox           | <i>Setaria reverchonii</i> subsp.<br><i>ramiseta</i> (Scribn.) W.E. Fox           |
|                                            |                                                      |                                                      | <i>Setaria variifolia</i><br>(Swallen) Davidse                                       | <i>Setaria variifolia</i> (Swallen)<br>Davidse                                    |
